# Supplementary material
Source: publisher figshare collection journal article supplement (https://acs.figshare.com/ndownloader/files/4694812)
Supplement: Supplementary file 1 [file 4694812]

# IR calculations

Depending on the positive sense and on the parity of the number of methylene, the angle can be expressed in two manners:

Either from the vibrations aCH3 and sCH2 with:

(eq. 6)

or from the vibrations sCH3  and sCH2 with:

(eq. 7)

in which  is the angle between a C-C bond and the Z molecular axis.

Depending on the sign of the square root, four different values of the tilt angle are calculated: 1+, 1- and 2+, 2-.

The contribution of gauche conformations is obtained from the new angle function F’() for the aCH3 and sCH3  vibrations in the presence of one gauche defect. First we choose a base attached to the molecule in the gauche conformation (x”’, y”’, z’). We calculate the product of several rotation matrices that allow to pass from the previous base to the base attached to the substrate (X, Y, Z) (see Fig. 3).

Considering Ntran*s*and Ngauch*e* the percentage of molecules in their trans and gauche conformations, respectively, new angle functions of the vibrations considered gives the corrected intensities Ith for a percentage of gauche forms Ngauche

( eq. 8 ) ( eq. 9)

The tilt angles are then calculated based on the values of . After an iterative calculation a certain value of will give 1 and 2 equal. The resulting angle represents the real tilt of the molecule on the surface.

Before using the previous equations, we need to calculate the new angle functions.

|  | **Figure 9**: Position of a CH3 gauche defect and the bases used |
| --- | --- |

*Calculation of angle functions:*

For a totally trans conformation, the angle functions are:

and

For a molecule in a gauche conformation, we get for the angle functions:

and

the rotations of  = +120° and  = -120° have the same probability; then we calculate the average of the two corresponding angle functions.

The first value of the angle function is taken as the average of the positive (or negative) values of a. The following Table gives these values with + = 18.55° and + = 14.45° for ODT/Zn and + = 14.55°and -= -19.15° for DT /Zn.

Table2. Numerical values of the function angle F for the values of +, -

|  | DT /Zn | | | |
| --- | --- | --- | --- | --- |
|  |  |  |  |
| *+* | 0.518 | 0.482 | 0.968 | 0.032 |
| *-* | 0.224 | 0.776 | 0.965 | 0.035 |

|  | ODT /Zn | | | |
| --- | --- | --- | --- | --- |
|  |  |  |  |
| *+* | 0.588 | 0.412 | 0.951 | 0.049 |
| *-* | 0.185 | 0.815 | 0.943 | 0.057 |

# Table 1: Integrated values of CH stretching bands of both bulk thiols and monolayers of CH3(CH2)9‑SH and CH3(CH2)17-SH

| Modes | DT /Zn | Neat liquid DT | ODT /Zn | Neat liquid ODT |
| --- | --- | --- | --- | --- |
| aCH3 ip | 0.887 | 0.163 | 0.508  0.157 | 0.115 |
| aCH3 op | 0.250 |
| aCH2 | 1 | 1 | 1 | 1 |
| sCH3 | 0.273 | 0.021 | 0.206 | 0.026 |
| sCH2 | 0.396 | 0.569 | 0.348 | 0.539 |
